# Supplementary material for: Photothermal responsive composites of graphene oxide/liquid crystal networks with different mesogenic arrangements towards flexible and bionic devices
Source: Royal Society of Chemistry journal article supplement (doi:10.1039/d2tc05370e), 2023-01-01
Supplement: d2tc05370e7.pdf [file d2tc05370e7.pdf]

Supporting Information

# Photothermal Responsive Composites of Graphene Oxide/Liquid Crystal Networks with Different Mesogenic Arrangements towards Flexible and Bionic Devices

Ruicai Guo<sup>1</sup>, Wenhui Gao<sup>1</sup>, Xiaoshuai Li<sup>2</sup>, Meishan Zhang<sup>1</sup>, Hongmei Ma<sup>1</sup>, Haifeng Yu<sup>3</sup>, Yubao Sun<sup>1,2,\*</sup>.

<sup>1</sup> Department of Applied Physics, Hebei University of Technology, Tianjin300401, PR China

<sup>2</sup> School of Electronic and Information Engineering, Hebei University of Technology, Tianjin300401, PR China.

<sup>3</sup> School of Material Science and Engineering, Key Laboratory of Polymer Chemistry and Physics of Ministry of Education, Peking University, Beijing 100871, PR China

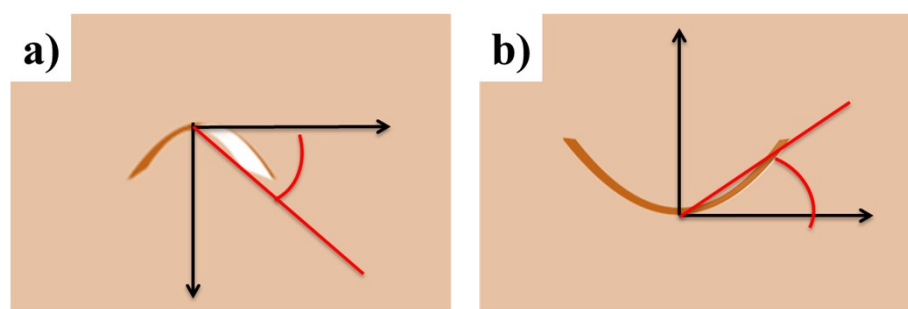

Figure S1. Diagram of bending Angle

When the edge of the film is bent, we define the angle between the centre of the bend and the horizontal line of the edge of the film as the bending angle of the film, which is taken as negative when the edge is bent downwards and positive when the edge is bent upwards.

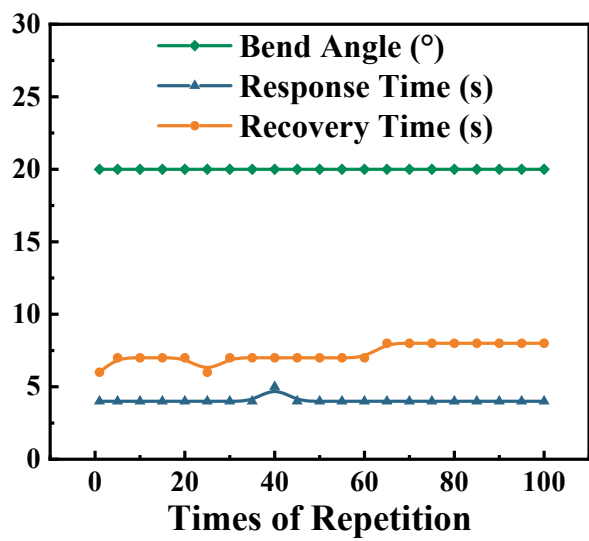

Figure S2. Response performance of Type I film in the 100 stimulus-response tests

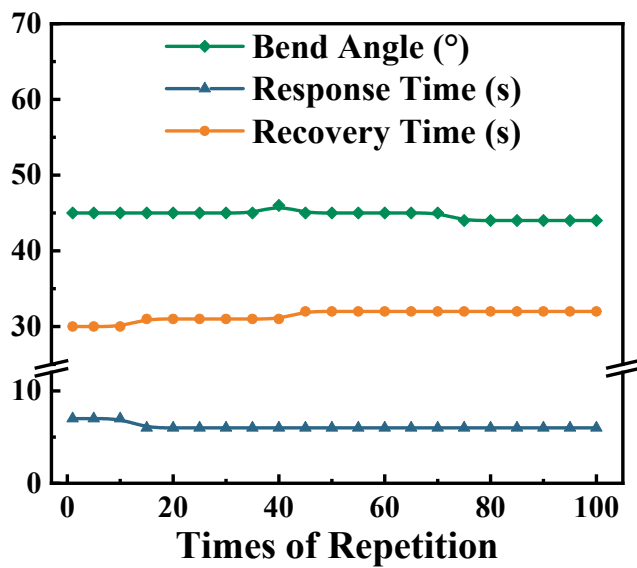

Figure S3. Response performance of Type II film in the 100 stimulus-response tests

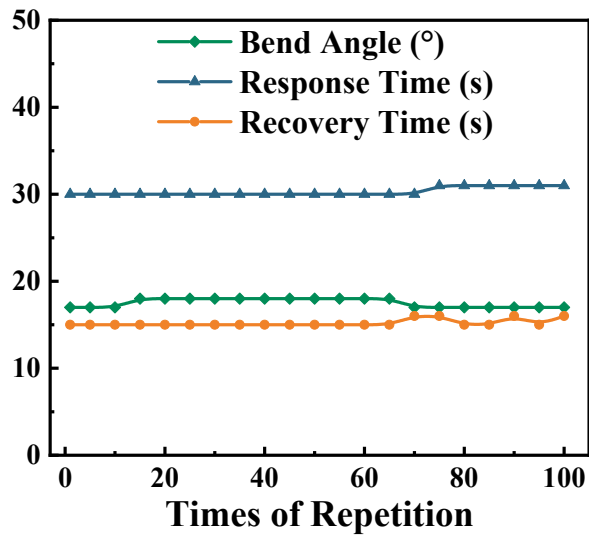

Figure S4. Response performance of Type III film in the 100 stimulus-response tests

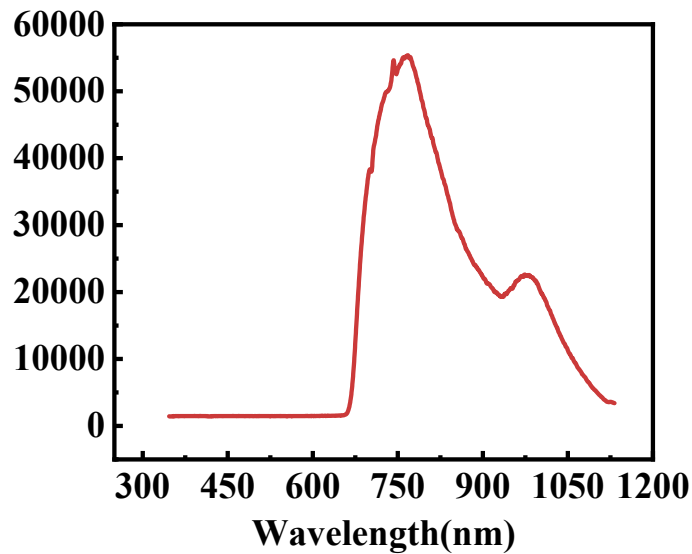

Figure S5. Near-infrared spectrograms used in the paper

### Supplementary movie legends

Supplement files S1: Fluttering behaviour of a bionic butterfly stimulated by infrared light. (The infrared intensity is 200 mW/cm<sup>2</sup>, and the response time of the bionic butterfly is 5s.)

Supplement files S2: Curling behaviour of a bionic leaf stimulated by infrared light. (The infrared intensity is 200 mW/cm<sup>2</sup>, and the response time of the bionic leaf is 3s.)

Supplement files S3: Biomimetic looper designed to achieve crawling behaviour under

infrared stimulation. (The infrared light intensity is 200 mW/cm<sup>2</sup>, and the response time of the bionic looper is 5s.)

Supplement files S4: Smart hook for heavy object extraction under the stimulation of infrared light. (The infrared intensity is 220 mW/cm<sup>2</sup>, and the response time of the bionic hook is 3s.)

Supplement files S5: Smart tweezer for heavy grasping heavy objects under the stimulation of infrared light. (The infrared intensity is 220 mW/cm<sup>2</sup>, and the response time of the bionic hook is 7s.)

Supplement files S6: A bionic robot composed of several types of composite membranes walked under infrared stimulation. (The infrared intensity is 220 mW/cm<sup>2</sup>, and the response time of the bionic robot is 5s.)
